# Supplementary material for: Sleep, Well-Being, and Cognition in Medical Interns on a Float or Overnight Call Schedule
Source: PubMed Central journal article supplement (PMC11581674; doi:10.1001/jamanetworkopen.2024.38350), 2024-10-11
Supplement: jamanetwopen-e2438350-s002.pdf [file jamanetwopen-e2438350-s002.pdf]

## Data Sharing Statement

Massar. Sleep, Well-Being, and Cognition in Medical Interns on a Float or Overnight Call Schedule. *JAMA Netw Open*. Published October 11, 2024.

doi:10.1001/jamanetworkopen.2024.38350

### Data

**Data available:** No
